# Supplementary material for: A tissue-scale gradient of hydrogen peroxide mediates rapid wound detection in zebrafish
Source: Springer Nature journal article supplement (doi:10.1038/nature08119), 2009-06-01
Supplement: 41586_2009_BFnature08119_MOESM332_ESM.pdf [file 41586_2009_BFnature08119_MOESM332_ESM.pdf]

## Supplementary Figure S1

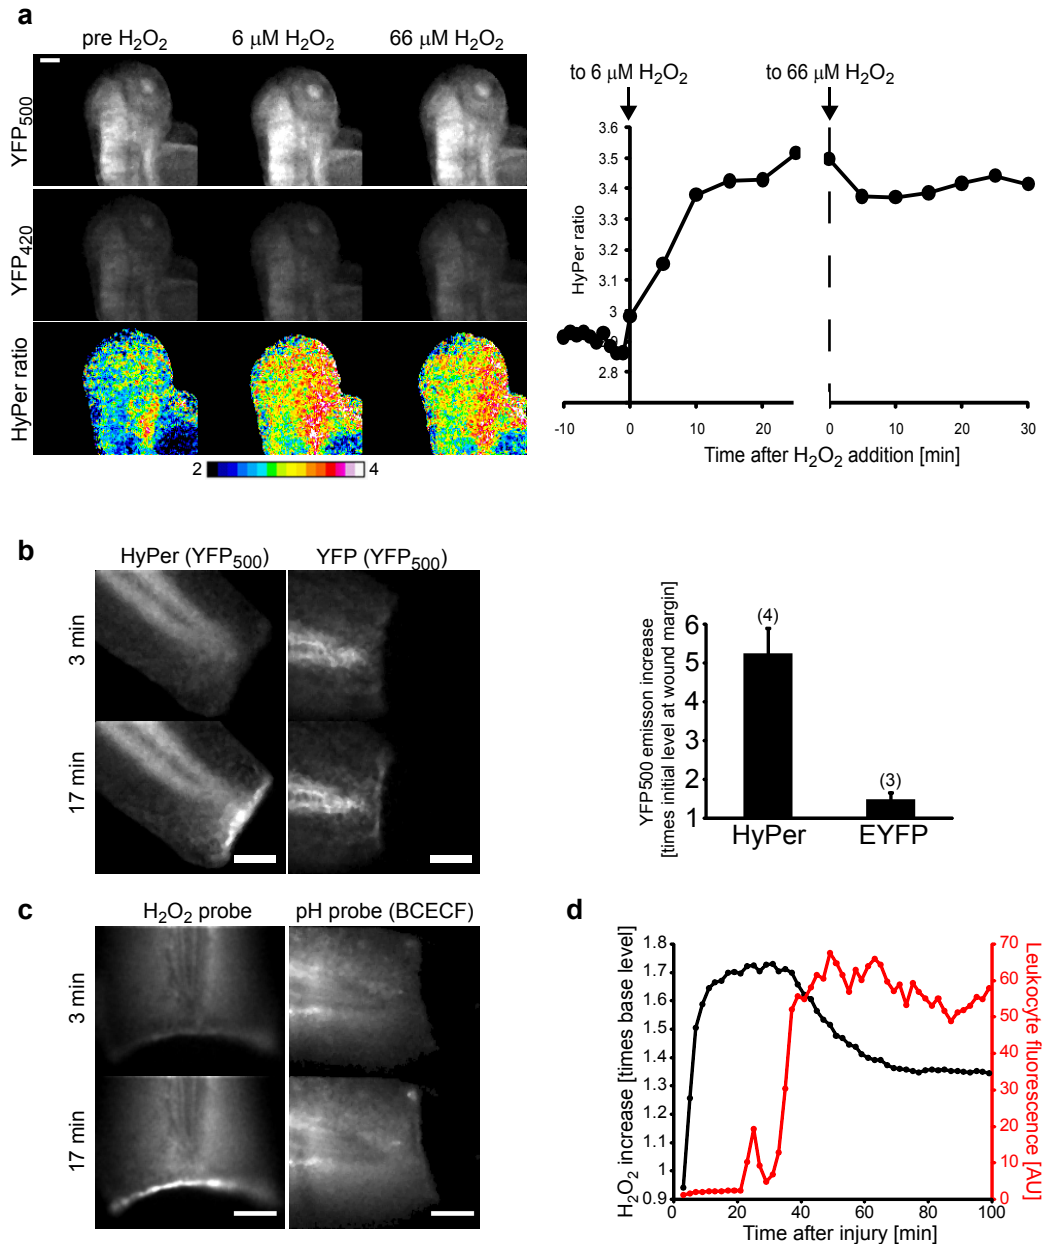

**Figure S1.** (a) Left panel: HyPer emission (YFP<sub>500</sub>, YFP<sub>420</sub>) and HyPer ratio of a 3 dpf zebrafish larva at indicated times before (-10 to -2 min) and after (0 - 25 min) subsequent addition of 6 μM and 60 μM H<sub>2</sub>O<sub>2</sub> to the fish bathing water. Right panel: HyPer ratio (YFP<sub>500</sub>/YFP<sub>420</sub>) plotted vs. time after H<sub>2</sub>O<sub>2</sub> addition. (b) Left panel: YFP<sub>500</sub> of HyPer and EYFP expressed in 3 dpf larvae, imaged at indicated times after tail fin injury. Right panel: quantification of YFP<sub>500</sub> emission of HyPer and EYFP (17 min pw). Up-regulation of emission is expressed as multiple of the initial emission at the wound margin (as measured 3 min pw). Error bars: SEM of indicated number of larvae (brackets). (c) Side by side comparison of an alternative fluorogenic H<sub>2</sub>O<sub>2</sub> probe (Acetyl-pentafluorobenzenesulfonyl fluorescein) and pH probe (BCECF-AM) imaged at indicated times after tail fin injury. (d) Quantification of time-lapse sequence depicted in Figure 1e. H<sub>2</sub>O<sub>2</sub> production (expressed as multiple of base value,  $f_{mult}$ ; see Methods) and leukocyte fluorescence (*lysC::DsRED2*) at the wound margin plotted vs. time after injury. Note that scaling of individual fluorescence channels has been adjusted to improve grayscale contrast, but is the same between subsequent time-points of each channel. Scale bars: 100 μm.

## Supplementary Figure S2

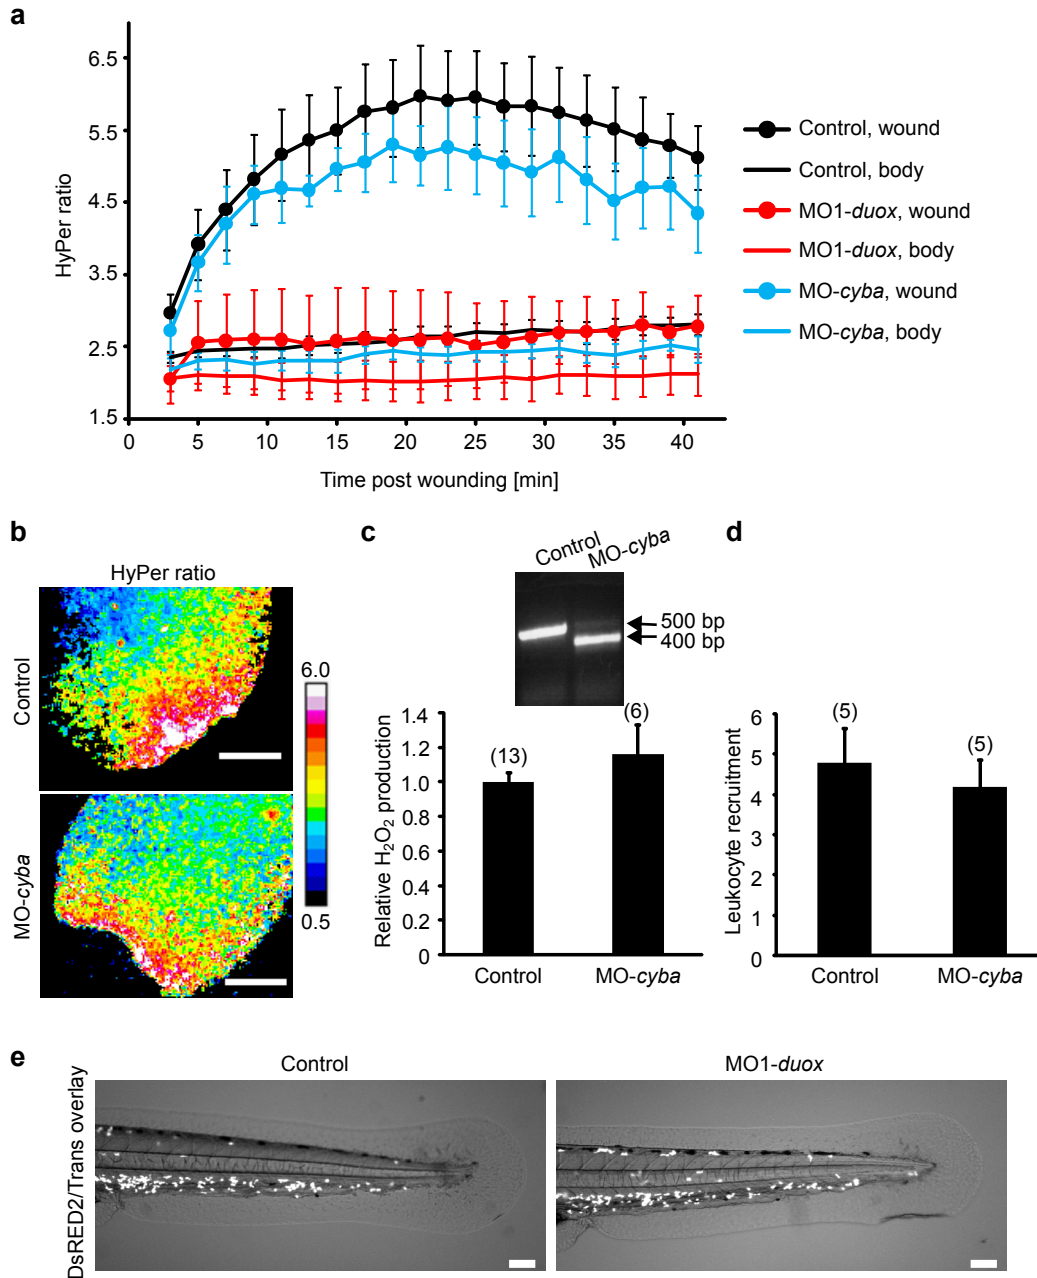

**Figure S2.** (a) Averaged kinetic profiles of wound margin (filled circles) and basal HyPer signals in response to *duox* and *cyba* morpholino knockdown (MO1-*duox*, MO-*cyba*) in 3 dpf HyPer expressing larvae. Error bars: SEM of  $n=3$  larvae per sample. (b) Wound margin  $H_2O_2$  production in response to *cyba* ( $P22^{phox}$ ) morpholino knockdown in 3 dpf larvae compared to control, imaged 17 min pw. (c) Quantification of  $H_2O_2$  production in *cyba* knockdown larvae (MO-*cyba*) compared to control, evaluated 17 min after wounding. Inset: RT-PCR of  $P22^{phox}$  mRNA from MO-*cyba* injected and control larvae (3 dpf). Error bars: SEM of indicated number of larvae (brackets). (d) Quantification of leukocyte recruitment in *cyba* knockdown larvae (MO-*cyba*) compared to control. Error bars: SEM of indicated number of larvae (brackets). (e) Representative images of fluorescent leukocytes in wt (control), or *duox/p53* knockdown (MO1-*duox*) *lysC::DsRED2* larvae (3 dpf), superimposed with the corresponding transmission images. Scale bars: 100  $\mu$ m.

## Supplementary Figure S3

a

|                              | Average Velocity<br>[ $\mu\text{m}/\text{min}$ ]<br>( $\pm$ s.e.m.) | Path<br>Linearity<br>( $\pm$ s.e.m.) | Wound<br>Directionality<br>( $\pm$ s.e.m.) | Number of cells<br>moving* / Number<br>of larvae inspected | Mean number of cells<br>moving* in the tail<br>fin (per larva) |
|------------------------------|---------------------------------------------------------------------|--------------------------------------|--------------------------------------------|------------------------------------------------------------|----------------------------------------------------------------|
| No wound                     | $4.68 \pm 0.45$                                                     | $0.45 \pm 0.06$                      | n.a.                                       | 19 / 11                                                    | 1.7                                                            |
| Wound, 100 $\mu\text{M}$ DPI | $4.99 \pm 0.83$                                                     | $0.55 \pm 0.10$                      | $0.53 \pm 0.09$                            | 12 / 10                                                    | 1.2                                                            |
| Wound, MO1- <i>duox</i>      | $5.79 \pm 0.54$                                                     | $0.59 \pm 0.05$                      | $0.48 \pm 0.05$                            | 32 / 12                                                    | 2.6                                                            |
| Wound, 5-MP                  | $7.81 \pm 0.27$                                                     | $0.78 \pm 0.02$                      | $0.71 \pm 0.02$                            | 100 / 12                                                   | 8.3                                                            |

\* only cells describing a total pathlength of at least 50  $\mu\text{m}$  were scored

T-test, p-values:

| Average v             | No wound | 100 $\mu\text{M}$ DPI | MO1- <i>duox</i> | 5-MP     |
|-----------------------|----------|-----------------------|------------------|----------|
| No wound              | n.a.     | 0.75                  | 0.12             | 1.35E-06 |
| 100 $\mu\text{M}$ DPI |          | n.a.                  | 0.42             | 6.32E-03 |
| MO1- <i>duox</i>      |          |                       | n.a.             | 1.55E-03 |

| Linearity             | No wound | 100 $\mu\text{M}$ DPI | MO1- <i>duox</i> | 5-MP     |
|-----------------------|----------|-----------------------|------------------|----------|
| No wound              | n.a.     | 0.42                  | 0.08             | 8.50E-05 |
| 100 $\mu\text{M}$ DPI |          | n.a.                  | 0.67             | 0.04     |
| MO1- <i>duox</i>      |          |                       | n.a.             | 5.25E-04 |

| Wound dir             | 100 $\mu\text{M}$ DPI | MO1- <i>duox</i> | 5-MP     |
|-----------------------|-----------------------|------------------|----------|
| 100 $\mu\text{M}$ DPI | n.a.                  | 0.66             | 0.09     |
| MO1- <i>duox</i>      |                       | n.a.             | 2.01E-04 |

b

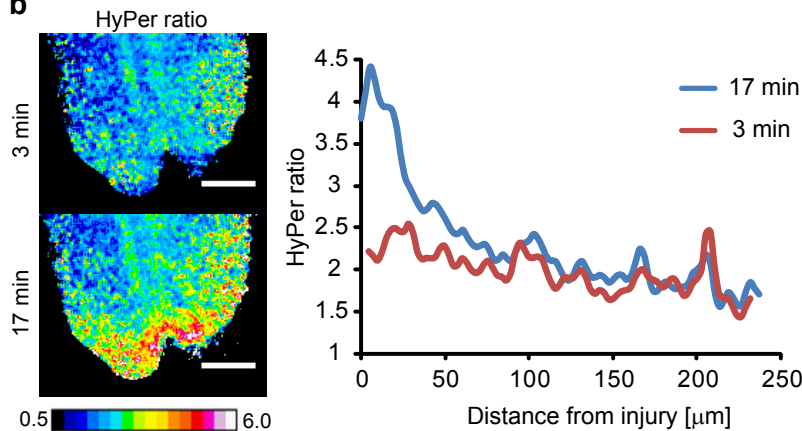

c

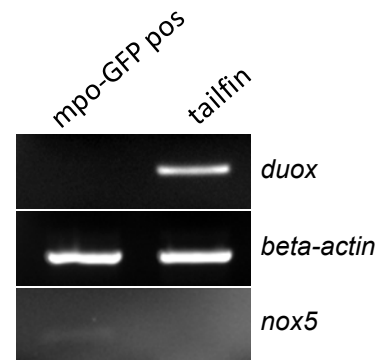

**Figure S3.** (a) Statistical evaluation of leukocyte tracks scored in non-injured, injured and 100  $\mu\text{M}$  DPI treated, injured and MO1-*duox* or MO5-MP-*duox* (5-MP) injected larvae. Only adequately identifiable, at least 50  $\mu\text{m}$  long tracks outside a 50  $\mu\text{m}$  radius around the center of mass of the wound, within the ventral tail fin tissue were scored for analysis (see Methods). Lower panels: summary of p-values (ttest). P values < 0.05 are highlighted. (b) Wound margin  $\text{H}_2\text{O}_2$  production as detected by HyPer in response to a small tail fin incision at indicated times after injury. Right panel: spatial  $[\text{H}_2\text{O}_2]$  profile at the indicated times after wounding, measured along a line approximately normal to the wound margin. Scale bar: 100  $\mu\text{m}$ . (c) *Duox*, *nox5* and *beta-actin* mRNA expression in green fluorescent leukocytes (isolated by FACS from disaggregated 3 dpf *mpo::GFP* larvae) and dissected tail fin tip tissue of 3 dpf AB larvae as evaluated by semi-quantitative RT-PCR.
